# Supplementary material for: A New Glycan-Dependent CD4-Binding Site Neutralizing Antibody Exerts Pressure on HIV-1 In Vivo
Source: PubMed Central journal article supplement (PMC4627763; doi:10.1371/journal.ppat.1005238), 2015-10-30

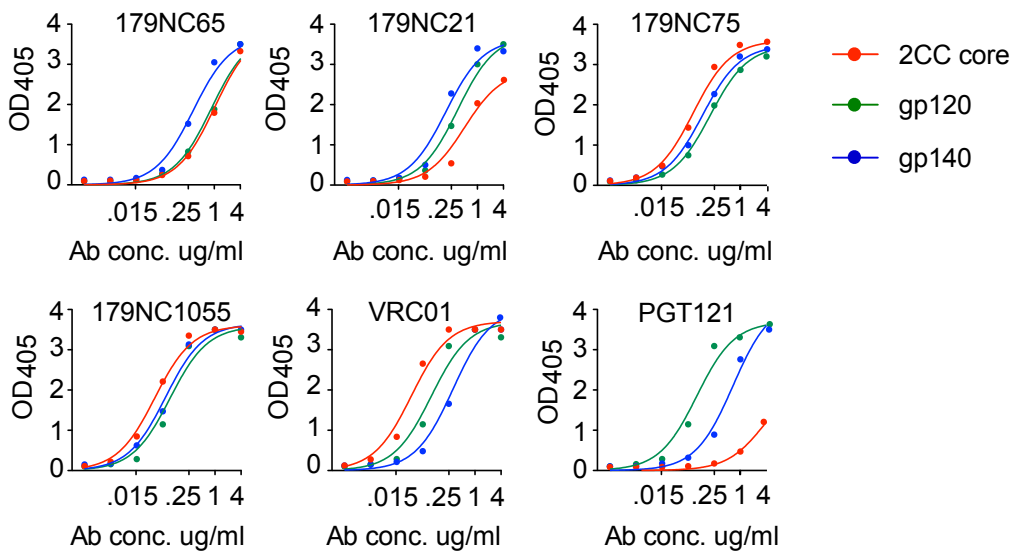

Supplement: ppat.1005238.s002.pdf [file ppat.1005238.s002.pdf]
