# Supplementary material for: A New Glycan-Dependent CD4-Binding Site Neutralizing Antibody Exerts Pressure on HIV-1 In Vivo
Source: PubMed Central journal article supplement (PMC4627763; doi:10.1371/journal.ppat.1005238), 2015-10-30
Supplement: ppat.1005238.s003.pdf [file ppat.1005238.s003.pdf]

CAPTURE ANTIBODIES

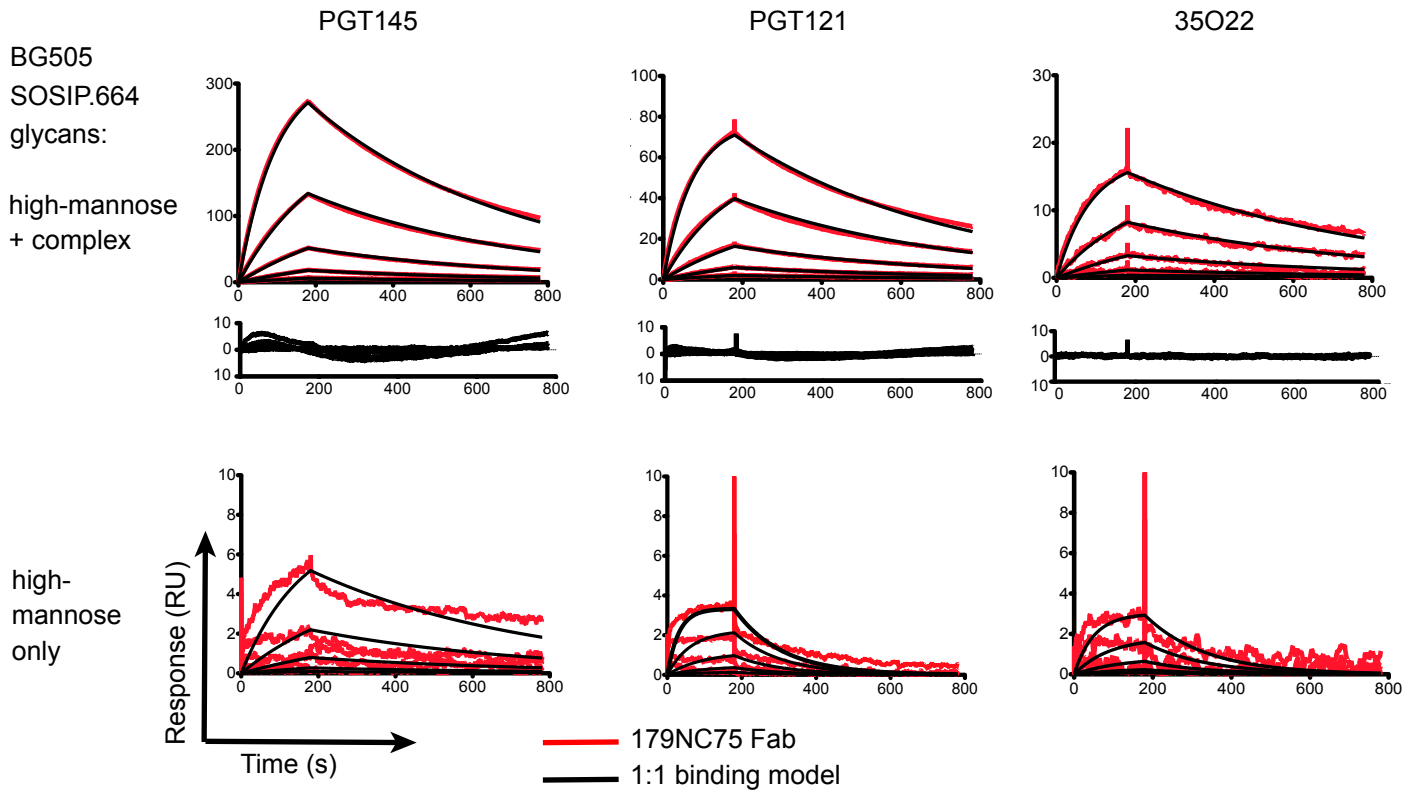

| Analyte     | Capture antibody/ligand | $k_a$ (1/Ms) | $k_d$ (1/s) | $K_D$ (M) | Rmax (RU) | Chi <sup>2</sup> (RU <sup>2</sup> ) |
|-------------|-------------------------|--------------|-------------|-----------|-----------|-------------------------------------|
| 179nc75 Fab | PGT121 IgG              | 1.92E+04     | 1.84E-03    | 9.61E-08  | 104.1     | 1.36                                |
| 179nc75 Fab | PGT145 IgG              | 1.59E+04     | 1.87E-03    | 1.18E-07  | 402.4     | 5.54                                |
| 179nc75 Fab | 35O22 IgG               | 1.61E+04     | 1.45E-03    | 9.00E-08  | 44        | 0.185                               |
