# Supplementary material for: A New Glycan-Dependent CD4-Binding Site Neutralizing Antibody Exerts Pressure on HIV-1 In Vivo
Source: PLoS Pathog. 2015 Oct 30;11(10):e1005238. doi: 10.1371/journal.ppat.1005238 (PMC4627763; doi:10.1371/journal.ppat.1005238)
Supplement: S4 Table — The number of viruses tested for each clade and the % of breadth (i.e., the proportion neutralized) is shown. The mean IC50 and IC80 values represent a geometric mean of all the IC50 and IC80 values derived for the given clade. The total % breadth and IC50 and IC80 values were calculated by averaging the corresponding values for each individual clade. The color-coding scheme is the same as used in S1 Table. (XLSX) [file ppat.1005238.s008.xlsx]

## Sheet: Sheet1
Table S4 - Summary of IC50 and IC80 values for the 120-viral panel
	Clade	Number of strains	Breadth %	Mean IC50	Mean IC80
	A	11	45	0.016	0.916
	B	23	70	0.113	0.291
	C	31	22	0.283	6.432
	BC	8	25	0.5403	>30
	CD	5	40	1.658	>30
	AC/ACD	6	0	>30	>30
	CRF02_AG	13	31	0.318	1.324
	CRF01_AE	11	9.46	0.025	0.082
	G	7	14	0.012	0.151
	D	5	75	0.081	0.081
	total	120	36.8289	0.115087	0.419248
