# Supplementary material for: A New Glycan-Dependent CD4-Binding Site Neutralizing Antibody Exerts Pressure on HIV-1 In Vivo
Source: PLoS Pathog. 2015 Oct 30;11(10):e1005238. doi: 10.1371/journal.ppat.1005238 (PMC4627763; doi:10.1371/journal.ppat.1005238)
Supplement: S6 Table — PGT145, 35O22 or PGT121 IgG were used to capture BG505 SOSIP.664 produced in HEK293-6E cells (resulting in a mixture of complex and high-mannose glycans) or HEK293-6E cells treated with kifunensine (resulting in high-mannose glycans only). Due to different binding efficiencies of each capture antibody, final trimer capture levels differed as indicated. Fab fragments of 179NC75, 3BNC60 and 8ANC195 were injected over the resulting surfaces at 500 nM concentration, resulting in the indicated binding levels. Comparing the ratios of binding levels for Fabs to both glycoforms of captured trimer demonstrates that 179NC75 binds preferentially to BG505 SOSIP.664 trimer containing mixed (complex and high-mannose) glycans, while the control antibodies 3BNC60 and 8ANC195 are not sensitive to the trimer glycoform. (XLSX) [file ppat.1005238.s010.xlsx]

## Sheet: Sheet1
Table S5 - Binding of 179nc75 to BG505 trimer containing mixed or high-mannose-only glycans
	Capture Fc	Trimer glycosylation	Trimer capture level (RU)	Analyte	Analyte binding level (RU)	Ratio analyte bound/trimer captured	Ratio complex/ high-mannose trimer glycosylation
	PGT145	mixed	1035	179nc75	275	0.266	10.19
	PGT145	high-mannose	230	179nc75	6	0.026
	35O22	mixed	105	179nc75	16	0.152	8.89
	35O22	high-mannose	175	179nc75	3	0.017
	PGT121	mixed	390	179nc75	72	0.185	15.82
	PGT121	high-mannose	300	179nc75	3.5	0.012
	PGT145	mixed	1030	3BNC60	230	0.223	2.7
	PGT145	high-mannose	230	3BNC60	19	0.083
	35O22	mixed	140	3BNC60	23	0.164	1.54
	35O22	high-mannose	300	3BNC60	32	0.107
	PGT121	mixed	350	3BNC60	54	0.154	1.39
	PGT121	high-mannose	280	3BNC60	31	0.111
	PGT145	mixed	1030	8ANC195	56	0.054	1.56
	PGT145	high-mannose	230	8ANC195	8	0.035
	CD4Fc	mixed	405	8ANC195	21	0.052	1
	CD4Fc	high-mannose	560	8ANC195	29	0.052
	PGT121	mixed	350	8ANC195	16.5	0.047	1.1
	PGT121	high-mannose	280	8ANC195	12	0.043
